# Supplementary material for: Associations of 24-hour movement guidelines adherence with fruit and vegetable intake in university students
Source: PeerJ journal article supplement (doi:10.7717/peerj.17875), 2024-08-06
Supplement: codebook.pdf [file codebook.pdf]

| <b>Name</b>      | <b>Label</b>                             | <b>Value</b> | <b>Labels</b>                                      |
|------------------|------------------------------------------|--------------|----------------------------------------------------|
| gender           | sex                                      |              | 1 male<br>2 female                                 |
| age              | age                                      |              |                                                    |
| economic         |                                          |              |                                                    |
| BMI              | BMI                                      |              |                                                    |
| MVPA_guidelines  | meeting the PA guidelines                |              | 0 not meeting<br>1 meeting                         |
| sleep_guidelines | meeting the sleep guidelines             |              | 0 not meeting<br>1 meeting                         |
| SB_guidelines    | meeting the SB guidelines                |              | 0 not meeting<br>1 meeting                         |
| nutri2           | meeting the PA, SB, and sleep guidelines |              | 0 not meeting<br>1 meeting                         |
|                  |                                          |              | 1 never<br>2 sometimes<br>3 frequently<br>4 always |
| nutri3           | depression binary                        |              | 1 never<br>2 sometimes<br>3 frequently<br>4 always |
